# Supplementary material
Source: PubMed Central journal article supplement (PMC9513855)
Supplement: NEJMc2205944_appendix.pdf [file NEJMc2205944_appendix.pdf]

## Supplementary Appendix

Supplement to: Anderson AS, Caubel P, Rusnak JM. Nirmatrelvir–ritonavir and viral load rebound in Covid-19. N Engl J Med. DOI: 10.1056/NEJMc2205944

This appendix has been provided by the authors to give readers additional information about the work.

# Nirmatrelvir-Ritonavir and COVID-19 Viral Load Rebound

Annaliesa S. Anderson, Ph.D., Patrick Caubel, M.D., Ph.D., James M. Rusnak, M.D., Ph.D.

## Supplementary Appendix

### Contents

|                                                                       |    |
|-----------------------------------------------------------------------|----|
| <b>1. List of investigators</b> .....                                 | 1  |
| <b>2. Detection and quantification of SARS-CoV-2 viral load</b> ..... | 8  |
| <b>3. Tables</b> .....                                                | 9  |
| <b>4. Figures</b> .....                                               | 11 |
| <b>5. References</b> .....                                            | 13 |

### 1. List of investigators

The analysis was conducted based on the results of the EPIC-HR study reported by Hammond et al. (2022)<sup>1</sup>. The list of the EPIC-HR study investigators is reported by Hammond et al. (2022)<sup>1</sup>.

| <b>Name</b>            | <b>Institute</b>                                                           | <b>Location</b>                             |
|------------------------|----------------------------------------------------------------------------|---------------------------------------------|
| Aazami, Hessam         | Hope Clinical Research<br>Hope Clinical Research (COVID Satellite Site)    | Canoga Park, CA, USA<br>West Hills, CA, USA |
| Abinante, Matthew      | Ascada Research                                                            | Fullerton, CA, USA                          |
| Abrishamian, Luis      | South Bay Clinical Research Institute                                      | Torrance, CA, USA                           |
| Aguirre Rivero, Rafael | Centro de Investigacion Clinica Del Pacifico                               | Acapulco, Mexico                            |
| Akhan, Sila            | Kocaeli University Medical Faculty, Infection Disease                      | Kocaeli, Turkey                             |
| Aksoy, Firdevs         | Karadeniz Teknik Universitesi Farabi Hastanesi                             | Trabzon, Turkey                             |
| Al Barwani, Aalia      | Trio Clinical Trials                                                       | Houston, TX, USA                            |
| Amishima, Masaru       | National Hokkaido Medical Center                                           | Sapporo, Hokkaido, Japan                    |
| Anderson, Duane        | Excel Clinical Research                                                    | Las Vegas, NV, USA                          |
| Antonov, Chavdar       | Multiprofile Hospital for Active Treatment - Sveti Nikolay<br>Chudotvoretz | Lom, Bulgaria                               |

|                                         |                                                                                                |                                        |
|-----------------------------------------|------------------------------------------------------------------------------------------------|----------------------------------------|
| Avihingsanon, Anchalee                  | Bangkok Centre Hotel                                                                           | Bangrak, Bangkok, Thailand             |
|                                         | Chula Field Hospital                                                                           | Pathum Wan District, Bangkok, Thailand |
|                                         | Thai Red Cross Emerging Infectious Diseases Clinic                                             | Pathumwan, Bangkok, Thailand           |
|                                         | HIV Netherlands Australia Thailand Research Collaboration, Thai Red Cross AIDS Research Center | Pathumwan, Bangkok, Thailand           |
| Ayesu, Kwabena                          | Omega Research Orlando                                                                         | Orlando, FL, USA                       |
| Ayyappath, Paramez                      | Lisie Hospital                                                                                 | Kochi, Kerala, India                   |
| Balik, Ismail                           | Ankara University Medical Faculty, Ibni-Sina Hospital                                          | Ankara, Turkey                         |
| Barrat Hernandez, Alejandro             | FAICIC Clinical Research                                                                       | Veracruz, Veracruz, Mexico             |
| Batista de Moura Xavier de Moraes, Joao | Hospital Agamenon Magalhaes                                                                    | Recife, Brazil                         |
| Benitez, Omar                           | South Florida Research Center                                                                  | Miami, FL, USA                         |
| Benitez, Wilfrido                       | Eastern Research                                                                               | Hialeah, FL, USA                       |
| Berenfus, Vadym                         | Lviv City Clinic Hospital #4                                                                   | Lviv, Ukraine                          |
| Boghara, Haresh                         | Epic Medical Research                                                                          | Red Oak, TX, USA                       |
| Brabham, David                          | PharmaTex Research                                                                             | Amarillo, TX, USA                      |
| Buchvarov, Mladen                       | Outpatient Clinic for Primary Outpatient Medical Care                                          | Tsarevo, Bulgaria                      |
| Budhreja, Akshay                        | Aakash Healthcare                                                                              | New Delhi, India                       |
| Buendía Magaña, Ruben                   | Eme Red Hospitalaria                                                                           | Mérida, Yucatán, Mexico                |
| Buendia Suárez, Isabel                  | Instituto de Investigaciones Clínicas para la Salud                                            | Durango, Durango, Mexico               |
| Cannon, Kevin                           | Accellacare                                                                                    | Wilmington, NC, USA                    |
| Capote, Eddy                            | Herco Medical and Research Center                                                              | Coral Gables, FL, USA                  |
| Chaudhari, Piyush                       | Jehangir Clinical Development Centre                                                           | Pune, Maharashtra, India               |
| Chua, Hock Hin                          | Hospital Umum Sarawak                                                                          | Kuching, Sarawak, Malaysia             |
| Chusri, Sarunyou                        | Prince of Songkla University, Songklanagarind Hospital                                         | Hat Yai, Songkhla, Thailand            |
| Cortes, Anais                           | Inpatient Research Clinic                                                                      | Hialeah, FL, USA                       |
| Crawford, Paul                          | Research by Design                                                                             | Chicago, IL, USA                       |
| Curbelo Calleiro, Maria                 | Medimpact Clinical & Investigational Center                                                    | Miami, FL, USA                         |
| Czerech, Ewa                            | KLIMED Marek Klimkiewicz                                                                       | Bialystok, Poland                      |
| Dange, Amol                             | Lifepoint Research                                                                             | Pune, Maharashtra, India               |
| De La Vega, Dagoberto                   | Unlimited Medical Research Group                                                               | Hialeah Gardens, FL, USA               |
| Del Carpio Orantes, Luis                | Sociedad de Metabolismo y Corazon                                                              | Veracruz, Veracruz, Mexico             |
| Deno, Yohanna                           | CDC Research Institute                                                                         | Port Saint Lucie, FL, USA              |

|                              |                                                                                          |                                  |
|------------------------------|------------------------------------------------------------------------------------------|----------------------------------|
| Desantis, Kimberly           | Meridian Clinical Research                                                               | Endwell, NY, USA                 |
| Diaz, Jorge                  | Doral Medical Research                                                                   | Hialeah, FL, USA                 |
| Dobрева, Vanya               | DCC Sveti Georgi                                                                         | Plovdiv, Bulgaria                |
| Dombi, Attila                | Trial Pharma Kft                                                                         | Bekescsaba, Hungary              |
| Drasnar, Tomas               | Nemocnice Slany                                                                          | Slany, Czech Republic            |
| Duardo-Guerra, Yamirka       | LCC Medical Research Institute                                                           | Miami, FL, USA                   |
| Dukes, Carl                  | Sun Research Institute                                                                   | San Antonio, TX, USA             |
| Fakih, Faisal                | Clinical Site Partners                                                                   | Winter Park, FL, USA             |
| Fam, Tem Lom                 | Hospital Miri                                                                            | Miri, Sarawak, Malaysia          |
| Fatakia, Adil                | Tandem Clinical Research GI                                                              | Marrero, LA, USA                 |
| Fernandez-Miro, Humberto     | Global Health Clinical Trials                                                            | Miami, FL, USA                   |
| Flores Figueroa, Jose        | JM Research                                                                              | Cuernavaca, Morelos, Mexico      |
| Fouche, Leon                 | Limpopo Clinical Research Initiative                                                     | Thabazimbi, South Africa         |
| Galitz, Lawrence             | GCP Research, Global Clinical Professionals                                              | St. Petersburg, FL, USA          |
| Galvez, Oscar                | Qway Research                                                                            | Hialeah, FL, USA                 |
| Garcia, Lazaro               | Entrust Clinical Research                                                                | Miami, FL, USA                   |
| Gavrylov, Anatoliy           | Kharkiv Regional Clinical Infectious Diseases Hospital                                   | Kharkiv, Ukraine                 |
| Georgieva, Stela             | Multiprofile Hospital for Active Treatment Targovishte                                   | Targovishte, Bulgaria            |
| Georgiev, Emil               | Diagnostic-Consultative Center I Lom                                                     | Lom, Bulgaria                    |
| Giriappa, Balachandra        | BGS Global Institute of Medical Sciences and Hospital                                    | Bangalore, Karnataka, India      |
| Gudzheva, Rumyana Gavrailova | Diagnostic-Consultative Center XXII - Sofia                                              | Sofia, Bulgaria                  |
| Gunduz, Alper                | Basaksehir Cam ve Sakura Sehir Hastanesi                                                 | Istanbul, Turkey                 |
| Gunluoglu, Gulsah            | Istanbul Yedikule Gogus Hastaliklari                                                     | Istanbul, Turkey                 |
| Haracherova, Kameliya        | Specialized Hospital for Active Treatment in Pulmonology and Phthisiology – Stara Zagora | Stara Zagora, Bulgaria           |
| Harcza, Eleonora             | Agria-Study Kft                                                                          | Eger, Hungary                    |
| Haytova, Nezabravka          | Specialized Hospital for Active Treatment of Pneumo-Phthisiatric Diseases - Vratsa       | Vratsa, Bulgaria                 |
| Hernández Pichardo, Joselito | Asociacion Mexicana para la Investigacion Clinica A.C. (AMIC)                            | Pachuca de Soto, Hidalgo, Mexico |
| Hernandez, Humberto          | Sunrise Research Institute                                                               | Sunrise, FL, USA                 |
| Hernandez, Manuel            | Savin Medical Group                                                                      | Miami Lakes, FL, USA             |
| Hirai, Yuji                  | Tokyo Medical University Hachioji Medical Center                                         | Hachioji, Tokyo, Japan           |
| Hoosen, Farzana              | Synapta Clinical Research Center                                                         | Durban, South Africa             |
| Hristova, Iskra              | Medical Center Leo Clinic                                                                | Varna, Bulgaria                  |

|                                     |                                                                                     |                                      |
|-------------------------------------|-------------------------------------------------------------------------------------|--------------------------------------|
| Hristovski, Boyan                   | MHAT St. Sofia                                                                      | Sofia, Bulgaria                      |
| Hussen, Nazreen                     | East Rand Research Centre T/A Worthwhile Clinical Trials                            | Benoni, South Africa                 |
| Igbinadolor, Awawu                  | Monroe Biomedical Research                                                          | Monroe, NC, USA                      |
| Inan, Dilara                        | Akdeniz Universitesi Hastanesi                                                      | Antalya, Turkey                      |
| Issa, Husam                         | Tranquility Research                                                                | Webster, TX, USA                     |
| Jain, Manish                        | Maharaja Agrasen Superspeciality Hospital                                           | Jaipur, Rajasthan, India             |
| Jeady, Wilner                       | Next Level Urgent Care                                                              | Houston, TX, USA                     |
| Jimenez, Mario                      | Kendall South Medical Center                                                        | Miami, FL, USA                       |
| Jindal, Atul                        | AIIMS Raipur                                                                        | Raipur, Chhattisgarh, India          |
| Kalfov, Veselin                     | Specialized Hospital for Active Treatment of Pneumo-Phthisiatric Diseases - Haskovo | Haskovo, Bulgaria                    |
| Kandemir, Fatma                     | Mersin University                                                                   | Mersin, Turkey                       |
| Kang, Seung Ji                      | Chonnam National University Bitgoeul Hospital                                       | Nam-gu, Republic of Korea            |
| Karabay, Oguz                       | Sakarya University Training and Research Hospital                                   | Sakarya, Turkey                      |
| Karaoglan, Ilkay                    | Gaziantep Universitesi Tip Fakultesi Sahinbey Uygulama ve Arastirma Hastanesi       | Gaziantep, Turkey                    |
| Karpenko, Olena                     | Kyiv City Clinical Hospital #1 of Kyiv City Council                                 | Kyiv, Ukraine                        |
| Khandelwal, Vipul                   | Apex Hospitals                                                                      | Jaipur, Rajasthan, India             |
| Kim, Jin Yong                       | Incheon Medical Center                                                              | Incheon, Republic of Korea           |
| Kim, Kenneth                        | Ark Clinical Research                                                               | Long Beach, CA, USA                  |
| Kireieva, Tetiana                   | City Clinical Hospital #16 of Dnipro City Council                                   | Dnipro, Ukraine                      |
| Kireyev, Igor                       | City Student Hospital of Kharkiv City Council                                       | Kharkiv, Ukraine                     |
| Kirov, Mihail                       | Medical Centre Leo Clinic                                                           | Lovech, Bulgaria                     |
| Kobrynska, Olena                    | Central City Clinical Hospital of Ivano-Frankivsk City                              | Ivano-Frankivsk, Ukraine             |
| Kochar, Sanjay                      | Sardar Patel Medical College                                                        | Pavan Puri Bikaner, Rajasthan, India |
| Kohli, Anita                        | Institute for Liver Health                                                          | Tucson, AZ, USA                      |
| Koksal, Iftihar                     | Acibadem University Atakent Hospital Infection Disease                              | Istanbul, Turkey                     |
| Kolar, Jan                          | Zdraví-Fit, s.r.o.                                                                  | Protivín, Czech Republic             |
| Komitov, Iliyan                     | Multiprofile Hospital for Active Treatment – Sliven to Military Medical Academy     | Sliven, Bulgaria                     |
| Kosinski, Joseph                    | Premier Medical Group                                                               | Clarksville, TN, USA                 |
| Koval, Tetiana                      | Poltava Regional Clinical Infectious Diseases Hospital                              | Poltava, Ukraine                     |
| Kowalczyk, John                     | American Institute of Research                                                      | Los Angeles, CA, USA                 |
| Kozlov, Roman                       | Smolensk State Medical University                                                   | Smolensk, Russian Federation         |
| Krainson, James and Rosenthal, Mark | Clinical Site Partners                                                              | Miami, FL, USA                       |
| Kutner, Mark                        | Suncoast Research Group                                                             | Miami, FL, USA                       |

|                                   |                                                                                                         |                                        |
|-----------------------------------|---------------------------------------------------------------------------------------------------------|----------------------------------------|
| Kwon, Ki Tae                      | Kyungpook National University Chilgok Hospital                                                          | Daegu, Republic of Korea               |
| Laningham, Robert                 | Conroe Willis Medical Research                                                                          | Conroe, TX, USA                        |
| Logoida, Pavlo                    | Polyclinic of Center for Medical Services and Rehabilitation                                            | Kyiv, Ukraine                          |
| Lopes, Suzara                     | Chronos Pesquisa Clinica                                                                                | Brasilia, Brazil                       |
| Lopez Romo, Alicia                | Christus - Latam Hub Center of Excellence and Innovation                                                | Monterrey, Nuevo Leon,                 |
| Macias Torres, Pablo              | Clinical Research Institute Saltillo                                                                    | Saltillo, Coahuila, Mexico             |
| Macias, Francisco                 | USPA Advance Concept Medical Research Group                                                             | South Miami, FL, USA                   |
| Maheshwari, Sanjiv                | Jawahar Lal Nehru Medical College                                                                       | Ajmer, Rajasthan, India                |
| Marinova, Dora                    | UMHAT Medica Ruse                                                                                       | Ruse, Bulgaria                         |
| Marquez Diaz, Francisco           | Hospital Cardiologica Aguascalientes                                                                    | Aguascalientes, Aguascalientes, Mexico |
| Martin, Anna                      | Xera Med Research                                                                                       | Boca Raton, FL, USA                    |
| Martinez Rivera, Orvil            | Advance Medical Research Center                                                                         | San Juan, Puerto Rico, Puerto Rico     |
| Martinez, Carlos and Casas, Julio | Beautiful Minds Clinical Research Center                                                                | Cutler Bay, FL, USA                    |
| Martinez, Cindy                   | Premium Medical Research                                                                                | Miami, FL, USA                         |
| Martynenko, Tatiana               | Barnaul City Hospital Number 5                                                                          | Barnaul, Russian Federation            |
| Mas, Luis                         | Advance Clinical Research Group                                                                         | Cutler Bay, FL, USA                    |
| Mert, Ali                         | Medipol Mega University Hospital                                                                        | Istanbul, Turkey                       |
| Metev, Hristo                     | Specialized Hospital for Active Treatment of Pneumo-Phthisiatric Diseases Dr. Dimitar Gramatikov - Ruse | Ruse, Bulgaria                         |
| Minova, Lyudmyla                  | Alexander Clinical Hospital                                                                             | Kyiv, Ukraine                          |
| Mir Remedios, Ariel               | C'A Research                                                                                            | Miami, FL, USA                         |
| Mitрева, Roza                     | Multiprofile Hospital for Active Treatment - Samokov                                                    | Samokov, Bulgaria                      |
| Mladenova-Todorova, Albena        | Multiprofile Hospital For Active Treatment                                                              | Shumen, Bulgaria                       |
| Modia, Jigar                      | Jupiter Hospital                                                                                        | Vadodara, Gujarat, India               |
| Mogashoa, Salphy                  | Botho ke Bontle Health Services                                                                         | Pretoria, South Africa                 |
| Monlux, George                    | MOORE Clinical Research                                                                                 | Brandon, FL, USA                       |
| Mootsikapun, Piroon               | Srinagarind Hospital, Khon Kaen University                                                              | Khon Kaen, Khon Kaen, Thailand         |
| Moroz, Larysa                     | Vinnysia City Clinical Hospital No. 1                                                                   | Vinnysia, Ukraine                      |
| Mussaji, Murtaza                  | LinQ Research                                                                                           | Pearland, TX, USA                      |
| Napora, Piotr                     | Centrum Badań Klinicznych Piotr Napora Lekarze Spółka Partnerska                                        | Wroclaw, Poland                        |
| Narejos Perez, Silvia             | EBA Centelles                                                                                           | Centelles, Barcelona, Spain            |
| Navarro-Alvarez, Samuel           | InfectoLab Consultorios de Especialidad en Infectologia                                                 | Baja California, Tijuana, Mexico       |

|                           |                                                                           |                                       |
|---------------------------|---------------------------------------------------------------------------|---------------------------------------|
| Nemechkin, Oleg           | Multiprofile Hospital for Active Treatment Sveti Ivan Rilski              | Razgrad, Bulgaria                     |
| Ohmagari, Norio           | National Center for Global Health and Medicine                            | Shinjuku City, Tokyo, Japan           |
| Oleynichenko, Ekaterina   | LLC Trekhgorka Medicine                                                   | Odintsovo, Moscow, Russian Federation |
| Ortiz, Francisco          | C & R Research Services USA                                               | Houston, TX, USA                      |
| Panayotov, Plamen         | Individual Practice for Primary Medical Care                              | Burgas, Bulgaria                      |
| Paoli-Bruno, Jorge        | Coral Research Clinic                                                     | Miami, FL, USA                        |
| Papp, Albert              | Trial Pharma                                                              | Gyula, Hungary                        |
| Parev, Atanas             | St. Panteleimon Hospital                                                  | Plovdiv, Bulgaria                     |
| Parikh, Naval             | NAPA Research                                                             | Pompano Beach, FL, USA                |
| Park, Sang-Won            | SMG-SNU Boramae Medical Center                                            | Seoul, Republic of Korea              |
| Patel, Bhaktasharan       | Future Innovative Treatments                                              | Colorado Springs, CO, USA             |
| Patel, Lisa               | Santos Research Center                                                    | Tampa, FL, USA                        |
| Penchev, Mladen           | Medical Center-1-Sevlievo                                                 | Sevlievo, Bulgaria                    |
| Peralta Lepe, Rogelio     | Instituto Jalisciense de Metabolismo                                      | Guadalajara, Jalisco, Mexico          |
| Petkov, Petyo             | MHAT Dr. Ivan Seliminski - Sliven                                         | Sliven, Bulgaria                      |
| Petrick, Friedrich        | MERC Middelburg                                                           | Middelburg, South Africa              |
| Pineiro, Yanelly          | Angels Clinical Research Institute                                        | Miami, FL, USA                        |
| Polat, Gulru              | Izmir Suat Seren Chest Disease and Surgery Training and Research Hospital | izmir, Turkey                         |
| Pryshlyak, Oleksandra     | Ivano-Frankivsk Regional Clinical Infectious Diseases Hospital            | Ivano-Frankivsk, Ukraine              |
| Pullman, John             | Mercury Street Medical Group                                              | Butte, MT, USA                        |
| Ramirez Hernandez, Amado  | Arke SMO                                                                  | Veracruz, Veracruz, Mexico            |
| Ramirez, Ariel            | Reed Medical Research                                                     | Miami, FL, USA                        |
| Reyes, Ramon              | BFHC Research                                                             | San Antonio, TX, USA                  |
| Rivera Martínez, Norma    | Oaxaca Site Management Organization                                       | Oaxaca De Juarez, Oaxaca, Mexico      |
| Sachdeva, Yessica         | Institute for Liver Health                                                | Mesa, AZ, USA                         |
| Sahu, Badal               | Nil Ratan Sircar Medical College and Hospital                             | Kolkata, West Bengal, India           |
| Saiger, Salma             | SMS Clinical Research                                                     | Mesquite, TX, USA                     |
| Samoilova, Svitlana       | Kyiv Railway Clinical Hospital No.2                                       | Kyiv, Ukraine                         |
| Sanchez Salazar, Sergio   | Eukarya Pharmasite                                                        | Monterrey, Nuevo Leon, Mexico         |
| Sanchez Vallejo, Gregorio | Fundacion Cardiomet CEQUIN                                                | Armenia, Colombia                     |

|                               |                                                                    |                                           |
|-------------------------------|--------------------------------------------------------------------|-------------------------------------------|
| Schneider, Linda              | TPMG (Tidewater Physicians Multispecialty Group) Clinical Research | Newport News, VA, USA                     |
| Siegel, Amy                   | ARC Clinical Research at William Cannon                            | Austin, TX, USA                           |
| Simon Campos, Jesus           | Kohler & Milstein Research                                         | Merida, Yucatan, Mexico                   |
| Simova, Iana                  | MHAT Heart and Brain                                               | Pleven, Bulgaria                          |
| Sims, James                   | St Hope Foundation                                                 | Bellaire, TX, USA                         |
| Simsek-Yavuz, Serap           | Istanbul University                                                | Istanbul, Turkey                          |
| Skolnick, Alan                | SignatureCare Emergency Center                                     | Houston, TX, USA                          |
| Sosa-Faria, Javier            | Clinical Research Management Group                                 | Ponce, Puerto Rico, Puerto Rico           |
| Sousa Regueiro, Maria Dolores | Complejo Hospitalario Universitario da Coruna                      | A Coruña, Spain                           |
| Suarez, Rosa                  | ProLive Medical Research                                           | Miami, FL, USA                            |
| Tabak, Omer                   | Istanbul University Cerrahpasa                                     | Istanbul, Turkey                          |
| Tiholov, Rumen                | MHAT Sv.Ivan Rilski - Kozloduy                                     | Kozloduy, Bulgaria                        |
| Tokunaga, Paula               | Centro de Estudos Clinicos do Interior Paulista (CECIP)            | Jau, São Paulo, Brazil                    |
| Tomaev, Uruzmag               | KDC (Evromedservis), OJSC                                          | Moscow, Russian Federation                |
| Tomas, Juan                   | Hospital De Clínicas Presidente Dr.Nicolas Avellaneda              | San Miguel de Tucuman, Tucuman, Argentina |
| Trevino, Miguel               | Innovative Research of West Florida                                | Clearwater, FL, USA                       |
| Tsushima, Kenji               | International University of Health and Welfare Narita Hospital     | Narita, Chiba, Japan                      |
| Ünal, Serhat                  | Hacettepe University Medical Faculty Hospital                      | Ankara, Turkey                            |
| Vahed, Yacoob                 | MERC Welkom                                                        | Welkom, South Africa                      |
| Varkonyi, Istvan              | Debreceni Egyetem Klinikai Kozpont Infektologiai Klinika           | Debrecen, Hungary                         |
| Vasylyev, Marta               | Regional Information and Analytical Center of Medical Statistics,  | Lviv, Ukraine                             |
| Vico, Marisa                  | Instituto de Investigaciones Clinicas Zarate                       | Zarate, Buenos Aires, Argentina           |
| Victoria, Rafaelito           | Atella Clinical Research                                           | La Palma, CA, USA                         |
| Vyshnyvetsky, Ivan            | Hospital #1 of Zhytomyr City Council                               | Zhytomyr, Ukraine                         |
| Warshoff, Neal                | Advanced Pulmonary Research Institute                              | Loxahatchee, FL, USA                      |
| Wever, David                  | Cahaba Research                                                    | Pelham, AL, USA                           |
| Winnie, Michael               | South Texas Clinical Research                                      | Corpus Christi, TX, USA                   |
| Yakovenko, Oleh               | Volyn Regional Clinical Hospital #2                                | Volyn, Ukraine                            |
| Yamato, Masaya                | Rinku General Medical Center                                       | Izumisano, Osaka, Japan                   |
| Zilahi, Zsolt                 | Medifarma-98                                                       | Nyiregyhaza, Hungary                      |

---

Table does not include sites that did not screen any patients for inclusion.



## **2. Detection and quantification of SARS-CoV-2 viral load**

As measured by the Abbott Real-Time (rt) Quantitative SARS-CoV-2 assay, a reverse transcriptase polymerase chain reaction (PCR) test utilizing reagents and equivalent application specifications of the Abbott rt SARS-CoV-2 Qualitative Emergency Use Authorization assay, modified in collaboration with Abbott Molecular, to quantitate SARS-CoV-2 nucleic acid in nasopharyngeal, oropharyngeal and nasal swab samples.

### 3. Tables

**Table S1. EPIC-HR Swab collection site by treatment and visit.** From ref.<sup>2</sup>

| <b>TREATMENT ARMS</b>                  | <b>A VISIT</b> | <b>NASOPHARYNX</b>   | <b>NOSTRIL</b>     | <b>MISSING</b>   |
|----------------------------------------|----------------|----------------------|--------------------|------------------|
| PLACEBO                                | Baseline       | 1086 (N=1086; 100%)  | 0 (N=1086; 100%)   | 0 (N=1086; 0%)   |
| Nirmatrelvir 300 mg + Ritonavir 100 mg | Baseline       | 1078 (N=1080; 99.8%) | 2 (N=1080; 0.2%)   | 0 (N=1080; 0%)   |
| PLACEBO                                | Day 3          | 995 (N=1040; 95.7%)  | 45 (N=1040; 4.3%)  | 0 (N=1040; 0%)   |
| Nirmatrelvir 300 mg + Ritonavir 100 mg | Day 3          | 983 (N=1038; 94.7%)  | 54 (N=1038; 5.2%)  | 1 (N=1038; 0.1%) |
| PLACEBO                                | Day 5          | 997 (N=1001; 99.6%)  | 4 (N=1001; 0.4%)   | 0 (N=1001; 0%)   |
| Nirmatrelvir 300 mg + Ritonavir 100 mg | Day 5          | 995 (N=1002; 99.3%)  | 5 (N=1002; 0.5%)   | 2 (N=1002; 0.2%) |
| PLACEBO                                | Day 10         | 870 (N=962; 90.4%)   | 92 (N=962; 9.6%)   | 0 (N=962; 0%)    |
| Nirmatrelvir 300 mg + Ritonavir 100 mg | Day 10         | 888 (N=989; 89.8%)   | 100 (N=989; 10.1%) | 1 (N=989; 0.1%)  |
| PLACEBO                                | Day 14         | 930 (N=1006; 92.4%)  | 76 (N=1006; 7.6%)  | 0 (N=1006; 0%)   |
| Nirmatrelvir 300 mg + Ritonavir 100 mg | Day 14         | 928 (N=1009; 92%)    | 81 (N=1009; 8%)    | 0 (N=1009; 0%)   |

| <b>Table S2. Viral load log<sub>10</sub> transformed means (SD, n) and median (range). Total EPIC-HR mITT2 population: Nirmatrelvir-Ritonavir N=1109, Placebo N=1115. VLR sub-study population: Nirmatrelvir-Ritonavir N=990, Placebo N=980. Population for VLR sub-study utilized participants with matched Day 5, Day 10 and/or Day 14 samples.</b> |                                                    |                                                      |                                |                                  |                              |
|-------------------------------------------------------------------------------------------------------------------------------------------------------------------------------------------------------------------------------------------------------------------------------------------------------------------------------------------------------|----------------------------------------------------|------------------------------------------------------|--------------------------------|----------------------------------|------------------------------|
| <b>Visit Day</b>                                                                                                                                                                                                                                                                                                                                      | <b>EPIC-HR mITT2 total population Mean (SD, n)</b> | <b>EPIC-HR mITT2 total population Median (Range)</b> | <b>VLR Subset Mean (SD, n)</b> | <b>VLR Subset Median (Range)</b> | <b>VLR Subset Proportion</b> |
| <b>Baseline</b>                                                                                                                                                                                                                                                                                                                                       |                                                    |                                                      |                                |                                  |                              |
| <b>Nirmatrelvir-Ritonavir</b>                                                                                                                                                                                                                                                                                                                         | 5.681 (2.100, 873)                                 | 5.990 (1.700, 9.160)                                 | 5.210 (2.555, 22)              | 5.840 (0.000, 8.460)             |                              |
| <b>Placebo</b>                                                                                                                                                                                                                                                                                                                                        | 5.522 (2.168, 888)                                 | 5.910 (1.700, 9.150)                                 | 4.801 (2.260, 17)              | 5.190 (0.000, 7.860)             |                              |
| <b>Day 3</b>                                                                                                                                                                                                                                                                                                                                          |                                                    |                                                      |                                |                                  |                              |
| <b>Nirmatrelvir-Ritonavir</b>                                                                                                                                                                                                                                                                                                                         | 3.891 (2.169, 821)                                 | 4.030 (0.000, 8.570)                                 | 4.117 (2.294, 22)              | 3.880 (0.000, 8.550)             |                              |
| <b>Placebo</b>                                                                                                                                                                                                                                                                                                                                        | 4.315 (2.390, 829)                                 | 4.660 (0.000, 9.540)                                 | 4.362 (2.458, 17)              | 5.240 (0.000, 7.500)             |                              |
| <b>Day 5</b>                                                                                                                                                                                                                                                                                                                                          |                                                    |                                                      |                                |                                  |                              |
| <b>Nirmatrelvir-Ritonavir</b>                                                                                                                                                                                                                                                                                                                         | 2.697 (1.835, 789)                                 | 2.690 (0.000, 7.820)                                 | 2.380 (1.783, 23)              | 2.120 (0.000, 5.760)             |                              |
| <b>Placebo</b>                                                                                                                                                                                                                                                                                                                                        | 3.314 (2.263, 792)                                 | 3.125 (0.000, 8.700)                                 | 2.439 (1.731, 17)              | 2.420 (0.000, 5.030)             |                              |
| <b>Day 10</b>                                                                                                                                                                                                                                                                                                                                         |                                                    |                                                      |                                |                                  |                              |
| <b>Nirmatrelvir-Ritonavir</b>                                                                                                                                                                                                                                                                                                                         | 1.419 (1.592, 782)                                 | 1.700 (0.000, 7.340)                                 | 2.173 (2.042, 22)              | 1.700 (0.000, 6.610)             |                              |
| <b>Placebo</b>                                                                                                                                                                                                                                                                                                                                        | 1.697 (1.740, 760)                                 | 1.700 (0.000, 7.630)                                 | 2.911 (2.223, 16)              | 3.285 (0.000, 7.170)             |                              |
| <b>Day 14</b>                                                                                                                                                                                                                                                                                                                                         |                                                    |                                                      |                                |                                  |                              |
| <b>Nirmatrelvir-Ritonavir</b>                                                                                                                                                                                                                                                                                                                         | 0.884 (1.258, 794)                                 | 0.000 (0.000, 8.090)                                 | 4.750 (1.496, 20)              | 4.505 (2.950, 8.090)             |                              |
| <b>Placebo</b>                                                                                                                                                                                                                                                                                                                                        | 0.970 (1.302, 800)                                 | 0.000 (0.000, 6.540)                                 | 4.626 (1.453, 14)              | 4.685 (2.740, 7.020)             |                              |
| <b>Proportion of Present and Persistent VLR*</b>                                                                                                                                                                                                                                                                                                      |                                                    |                                                      |                                |                                  |                              |
| <b>Nirmatrelvir-Ritonavir</b>                                                                                                                                                                                                                                                                                                                         |                                                    |                                                      |                                |                                  | 2.32% (23/990)               |
| <b>Placebo</b>                                                                                                                                                                                                                                                                                                                                        |                                                    |                                                      |                                |                                  | 1.73% (17/980)               |

\*Statistical VLR definition: If Day 14 viral load was not available, Day 10 viral load change from Day 5  $\geq 0.5 \log_{10}$  copies/mL and Day 10 viral load  $\geq 2.7 \log_{10}$  copies/mL, or If Day 14 viral load is available, Day 14 viral load change from Day 5  $\geq 0.5 \log_{10}$  copies/mL and Day 14 viral load  $\geq 2.7 \log_{10}$  copies/mL.  
Abbreviations: EPIC-HR, Evaluation of Protease Inhibition for COVID-19 in High-Risk Patients; mITT2, modified intention-to treat population; SD, standard deviation; VLR, viral load rebound.

## 4. Figures

A)

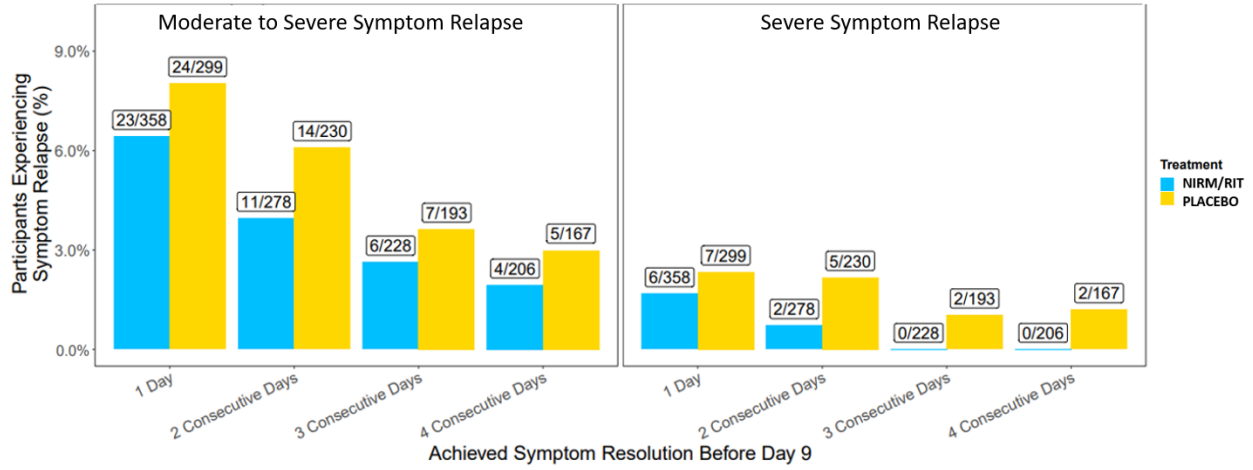

B)

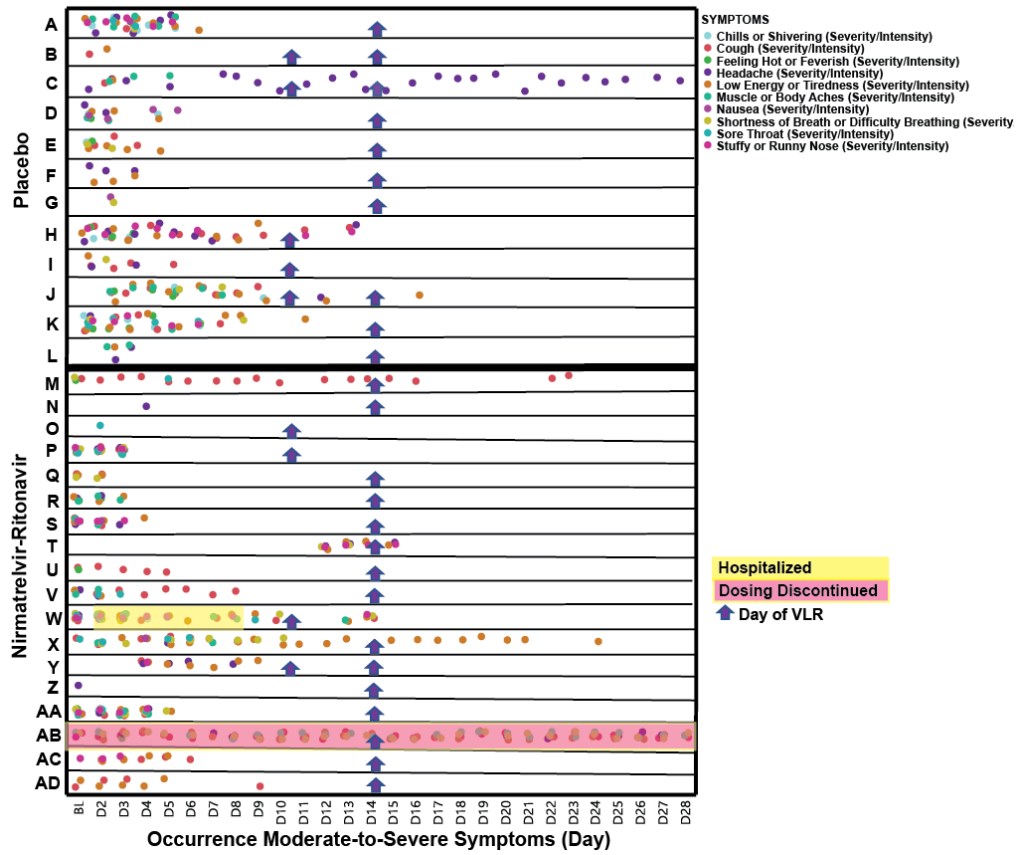

**Figure S1. VLR is not associated with recurrence of severe disease.** A) Participants on nirmatrelvir-ritonavir who achieved 3-4 consecutive days of symptom relief showed lower relapse during D8-D28 (0%) compared to placebo (1%). B) Individual moderate-severe symptoms in present and/or persistent VLR over 28 days. From ref.<sup>2</sup>.

## 5. References

1. Hammond J, Leister-Tebbe H, Gardner A, et al. Oral Nirmatrelvir for High-Risk, Nonhospitalized Adults with Covid-19. *N Engl J Med* 2022;386:1397-408.
2. Soares H, Baniecki ML, Cardin R, et al. Viral Load Rebound in Placebo and Nirmatrelvir-Ritonavir Treated COVID-19 Patients is not Associated with Recurrence of Severe Disease or Mutations. June 3, 2022 (<https://assets.researchsquare.com/files/rs-1720472/v1/d05313db-c500-4486-a678-2dd8c2423d3f.pdf>). preprint.
