# Supplementary material
Source: PubMed Central journal article supplement (PMC9513855)
Supplement: NEJMc2205944_disclosures.pdf [file NEJMc2205944_disclosures.pdf]

Disclosure Purpose: 22-05944

## Summary of Interests

### Company or Organization

| Entity                                                                                             | Type         | Interest Held By             |
|----------------------------------------------------------------------------------------------------|--------------|------------------------------|
| <a href="#">Pfizer Inc.</a>                                                                        | Employment   | Self                         |
| <i>Title:</i> Senior Vice President and Chief Scientific Officer Vaccines Research and Development |              | <i>Position Description:</i> |
| <i>Additional Information:</i>                                                                     |              |                              |
| <a href="#">Pfizer Inc.</a>                                                                        | Stock        | Self                         |
| <i>Additional Information:</i>                                                                     |              |                              |
| <a href="#">Pfizer Inc.</a>                                                                        | Stock Option | Self                         |
| <i>Additional Information:</i>                                                                     |              |                              |

### Intellectual Property

| Type                                                                                                                     | Is Licensed | Interest Held By                        |
|--------------------------------------------------------------------------------------------------------------------------|-------------|-----------------------------------------|
| <a href="#">Patent - Compositions and Methods for Eliciting an Immune ...</a>                                            | No          | Self                                    |
| <i>Description:</i> Compositions and Methods for Eliciting an Immune Response Against Clostridium Difficile              |             | <i>Patent Number:</i> PCT/IB2018/057076 |
| <i>Patent Holder:</i>                                                                                                    |             | <i>Patent Status:</i>                   |
| <i>Licensees:</i>                                                                                                        |             | <i>Filing Jurisdiction:</i>             |
| <i>Additional Information:</i>                                                                                           |             |                                         |
| <a href="#">Patent - Immunogenic Compositions Of Staphylococcus Aureu ...</a>                                            | No          | Self                                    |
| <i>Description:</i> Immunogenic Compositions Of Staphylococcus Aureus Antigens                                           |             | <i>Patent Number:</i> PCT/US2010/039510 |
| <i>Patent Status:</i>                                                                                                    |             | <i>Patent Holder:</i>                   |
| <i>Filing Jurisdiction:</i>                                                                                              |             | <i>Additional Information:</i>          |
| <i>Licensees:</i>                                                                                                        |             |                                         |
| <a href="#">Patent - Compositions and Methods for Eliciting an Immune ...</a>                                            | No          | Self                                    |
| <i>Description:</i> Compositions and Methods for Eliciting an Immune Response Against Clostridium Difficile              |             | <i>Patent Number:</i> PCT/IB2020/053005 |
| <i>Patent Holder:</i>                                                                                                    |             | <i>Patent Status:</i>                   |
| <i>Licensees:</i>                                                                                                        |             | <i>Filing Jurisdiction:</i>             |
| <i>Additional Information:</i>                                                                                           |             |                                         |
| <a href="#">Patent - Neisseria Meningitidis Compositions And Methods ...</a>                                             | No          | Self                                    |
| <i>Description:</i> Neisseria Meningitidis Compositions And Methods Thereof                                              |             | <i>Patent Number:</i> PCT/IB2014/064091 |
| <i>Patent Status:</i>                                                                                                    |             | <i>Patent Holder:</i>                   |
| <i>Filing Jurisdiction:</i>                                                                                              |             | <i>Additional Information:</i>          |
| <i>Licensees:</i>                                                                                                        |             |                                         |
| <a href="#">Patent - Group B Streptococcus Polysaccharide-Protein Con ...</a>                                            | No          | Self                                    |
| <i>Description:</i> Group B Streptococcus Polysaccharide-Protein Conjugates, Methods For Producing Conjugates, Immunogen |             | <i>Patent Number:</i> PCT/IB2016/052455 |
| <i>Patent Holder:</i>                                                                                                    |             | <i>Patent Status:</i>                   |
| <i>Licensees:</i>                                                                                                        |             | <i>Filing Jurisdiction:</i>             |
| <i>Additional Information:</i>                                                                                           |             |                                         |
| <a href="#">Patent - Neisseria Meningitidis Compositions and Methods ...</a>                                             | No          | Self                                    |
| <i>Description:</i> Neisseria Meningitidis Compositions and Methods Thereof                                              |             | <i>Patent Number:</i> PCT/IB2013/051791 |
| <i>Patent Status:</i>                                                                                                    |             | <i>Patent Holder:</i>                   |
| <i>Filing Jurisdiction:</i>                                                                                              |             | <i>Additional Information:</i>          |
| <i>Licensees:</i>                                                                                                        |             |                                         |
| <a href="#">Patent - Immunogenic Compositions Against Clostridioides ...</a>                                             | No          | Self                                    |
| <i>Description:</i> Immunogenic Compositions Against Clostridioides (Clostridium) Difficile And Methods Thereof          |             | <i>Patent Number:</i> PCT/IB2021/055373 |
| <i>Patent Holder:</i>                                                                                                    |             | <i>Patent Status:</i>                   |
| <i>Licensees:</i>                                                                                                        |             | <i>Filing Jurisdiction:</i>             |
| <i>Additional Information:</i>                                                                                           |             |                                         |
| <a href="#">Patent - Non-Lipidated Variants of Neisseria Meningitidis ...</a>                                            | No          | Self                                    |

|                                                                                                                                                                            |                                                                                                                                   |      |  |
|----------------------------------------------------------------------------------------------------------------------------------------------------------------------------|-----------------------------------------------------------------------------------------------------------------------------------|------|--|
| <i>Description:</i> Non-Lipidated Variants of Neisseria Meningitidis ORF2086 Antigens<br><i>Patent Status:</i><br><i>Filing Jurisdiction:</i><br><i>Licensees:</i>         | <i>Patent Number:</i> PCT/IB2011/053934<br><i>Patent Holder:</i><br><br><i>Additional Information:</i>                            |      |  |
| <a href="#">Patent - Immunogenic Fusion Polypeptides</a>                                                                                                                   | No                                                                                                                                | Self |  |
| <i>Description:</i> Immunogenic Fusion Polypeptides<br><i>Patent Status:</i><br><i>Filing Jurisdiction:</i><br><i>Licensees:</i>                                           | <i>Patent Number:</i> PCT/IB2014/059462<br><i>Patent Holder:</i><br><br><i>Additional Information:</i>                            |      |  |
| <a href="#">Patent - Group B Streptococcus Polysaccharide-protein Con ...</a>                                                                                              | No                                                                                                                                | Self |  |
| <i>Description:</i> Group B Streptococcus Polysaccharide-protein Conjugates, Methods for Producing Conjugates, Immunogen<br><i>Patent Holder:</i><br><i>Licensees:</i>     | <i>Patent Number:</i> PCT/IB2021/057714<br><i>Patent Status:</i><br><i>Filing Jurisdiction:</i><br><i>Additional Information:</i> |      |  |
| <a href="#">Patent - Immunogenic Compositions Comprising Conjugated C ...</a>                                                                                              | No                                                                                                                                | Self |  |
| <i>Description:</i> Immunogenic Compositions Comprising Conjugated Capsular Saccharide Antigens, Kits Comprising the Sam<br><i>Patent Holder:</i><br><i>Licensees:</i>     | <i>Patent Number:</i> PCT/IB2020/053280<br><i>Patent Status:</i><br><i>Filing Jurisdiction:</i><br><i>Additional Information:</i> |      |  |
| <a href="#">Patent - Compositions and Methods Relating to a Mutant Cl ...</a>                                                                                              | No                                                                                                                                | Self |  |
| <i>Description:</i> Compositions and Methods Relating to a Mutant Clostridium Difficile Toxin<br><i>Patent Status:</i><br><i>Filing Jurisdiction:</i><br><i>Licensees:</i> | <i>Patent Number:</i> PCT/IB2013/059183<br><i>Patent Holder:</i><br><br><i>Additional Information:</i>                            |      |  |
| <a href="#">Patent - Immunogenic Compositions Comprising Conjugated C ...</a>                                                                                              | No                                                                                                                                | Self |  |
| <i>Description:</i> Immunogenic Compositions Comprising Conjugated Capsular Saccharide Antigens and Uses Thereof<br><i>Patent Holder:</i><br><i>Licensees:</i>             | <i>Patent Number:</i> PCT/IB2022/054920<br><i>Patent Status:</i><br><i>Filing Jurisdiction:</i><br><i>Additional Information:</i> |      |  |
| <a href="#">Patent - Immunogenic compositions for use in pneumococcal ...</a>                                                                                              | No                                                                                                                                | Self |  |
| <i>Description:</i> Immunogenic compositions for use in pneumococcal vaccines<br><i>Patent Status:</i><br><i>Filing Jurisdiction:</i><br><i>Licensees:</i>                 | <i>Patent Number:</i> PCT/IB2021/060097<br><i>Patent Holder:</i><br><br><i>Additional Information:</i>                            |      |  |
| <a href="#">Patent - Multicomponent Immunogenic Composition For The P ...</a>                                                                                              | No                                                                                                                                | Self |  |
| <i>Description:</i> Multicomponent Immunogenic Composition For The Prevention Of Beta-hemolytic Streptococcal (BHS) Dise<br><i>Patent Holder:</i><br><i>Licensees:</i>     | <i>Patent Number:</i> PCT/US2009/063268<br><i>Patent Status:</i><br><i>Filing Jurisdiction:</i><br><i>Additional Information:</i> |      |  |
| <a href="#">Patent - Escherichia Coli Compositions And Methods Thereo</a>                                                                                                  | No                                                                                                                                | Self |  |
| <i>Description:</i> Escherichia Coli Compositions And Methods Thereof<br><i>Patent Status:</i><br><i>Filing Jurisdiction:</i><br><i>Licensees:</i>                         | <i>Patent Number:</i> PCT/IB2020/060081<br><i>Patent Holder:</i><br><br><i>Additional Information:</i>                            |      |  |
| <a href="#">Patent - Compositions And Methods Of Use Of ORF1358 From ...</a>                                                                                               | No                                                                                                                                | Self |  |
| <i>Description:</i> Compositions And Methods Of Use Of ORF1358 From Beta-hemolytic Streptococcal Strains<br><i>Patent Holder:</i><br><i>Licensees:</i>                     | <i>Patent Number:</i> PCT/US2009/047902<br><i>Patent Status:</i><br><i>Filing Jurisdiction:</i><br><i>Additional Information:</i> |      |  |
| <a href="#">Patent - Neisseria Meningitidis Compositions And Methods ...</a>                                                                                               | No                                                                                                                                | Self |  |
| <i>Description:</i> Neisseria Meningitidis Compositions And Methods Thereof<br><i>Patent Status:</i><br><i>Filing Jurisdiction:</i><br><i>Licensees:</i>                   | <i>Patent Number:</i> PCT/IB2018/050563<br><i>Patent Holder:</i><br><br><i>Additional Information:</i>                            |      |  |
| <a href="#">Patent - Neisseria Meningitidis Compositions And Methods ...</a>                                                                                               | No                                                                                                                                | Self |  |
| <i>Description:</i> Neisseria Meningitidis Compositions And Methods Thereof<br><i>Patent Status:</i><br><i>Filing Jurisdiction:</i><br><i>Licensees:</i>                   | <i>Patent Number:</i> PCT/IB2020/058928<br><i>Patent Holder:</i><br><br><i>Additional Information:</i>                            |      |  |
| <a href="#">Patent - Vaccination Against Bacterial And Betacoronaviru ...</a>                                                                                              | No                                                                                                                                | Self |  |
| <i>Description:</i> Vaccination Against Bacterial And Betacoronavirus Infections                                                                                           | <i>Patent Number:</i> PCT/IB2022/053951                                                                                           |      |  |

|                                                                                                                                                                                    |                                                                                                                                   |      |  |
|------------------------------------------------------------------------------------------------------------------------------------------------------------------------------------|-----------------------------------------------------------------------------------------------------------------------------------|------|--|
| <b>Patent Status:</b><br><b>Filing Jurisdiction:</b><br><b>Licensees:</b>                                                                                                          | <b>Patent Holder:</b><br><br><b>Additional Information:</b>                                                                       |      |  |
| <b>Patent - Immunogenic Polysaccharide Protein Conjugated Co ...</b>                                                                                                               | No                                                                                                                                | Self |  |
| <b>Description:</b> Immunogenic Polysaccharide Protein Conjugated Comprising A Polysaccharide Derived From B Streptococc<br><b>Patent Holder:</b><br><b>Licensees:</b>             | <b>Patent Number:</b> PCT/IB2017/056830<br><b>Patent Status:</b><br><b>Filing Jurisdiction:</b><br><b>Additional Information:</b> |      |  |
| <b>Patent - Neisseria Meningitidis Compositions And Methods ...</b>                                                                                                                | No                                                                                                                                | Self |  |
| <b>Description:</b> Neisseria Meningitidis Compositions And Methods Thereof<br><b>Patent Status:</b><br><b>Filing Jurisdiction:</b><br><b>Licensees:</b>                           | <b>Patent Number:</b> PCT/IB2016/050829<br><b>Patent Holder:</b><br><b>Additional Information:</b>                                |      |  |
| <b>Patent - Compositions And Methods For Preparing Staphyloc ...</b>                                                                                                               | No                                                                                                                                | Self |  |
| <b>Description:</b> Compositions And Methods For Preparing Staphylococcus Aureus Serotype 5 And 8 Capsular Polysaccharid<br><b>Patent Holder:</b><br><b>Licensees:</b>             | <b>Patent Number:</b> PCT/US2010/039473<br><b>Patent Status:</b><br><b>Filing Jurisdiction:</b><br><b>Additional Information:</b> |      |  |
| <b>Patent - Compositions And Methods Of Use Of ORF 554 From ...</b>                                                                                                                | No                                                                                                                                | Self |  |
| <b>Description:</b> Compositions And Methods Of Use Of ORF 554 From Beta Hemolytic Streptococcal Strains<br><b>Patent Holder:</b><br><b>Licensees:</b>                             | <b>Patent Number:</b> PCT/US2009/047886<br><b>Patent Status:</b><br><b>Filing Jurisdiction:</b><br><b>Additional Information:</b> |      |  |
| <b>Patent - Escherichia Coli Compositions and Methods Thereo</b>                                                                                                                   | No                                                                                                                                | Self |  |
| <b>Description:</b> Escherichia Coli Compositions and Methods Thereof<br><b>Patent Status:</b><br><b>Filing Jurisdiction:</b><br><b>Licensees:</b>                                 | <b>Patent Number:</b> PCT/IB2019/057025<br><b>Patent Holder:</b><br><b>Additional Information:</b>                                |      |  |
| <b>Patent - Compositions Relating To A Mutant Clostridium Di ...</b>                                                                                                               | No                                                                                                                                | Self |  |
| <b>Description:</b> Compositions Relating To A Mutant Clostridium Difficile Toxin And Methods Thereof<br><b>Patent Status:</b><br><b>Filing Jurisdiction:</b><br><b>Licensees:</b> | <b>Patent Number:</b> PCT/IB2012/051999<br><b>Patent Holder:</b><br><b>Additional Information:</b>                                |      |  |
| <b>Patent - Neisseria Meningitidis Compositions And Methods ...</b>                                                                                                                | No                                                                                                                                | Self |  |
| <b>Description:</b> Neisseria Meningitidis Compositions And Methods Thereof<br><b>Patent Status:</b><br><b>Filing Jurisdiction:</b><br><b>Licensees:</b>                           | <b>Patent Number:</b> PCT/IB2020/050988<br><b>Patent Holder:</b><br><b>Additional Information:</b>                                |      |  |
| <b>Patent - Compositions Comprising Three OspA Fusion Protei ...</b>                                                                                                               | No                                                                                                                                | Self |  |
| <b>Description:</b> Compositions Comprising Three OspA Fusion Proteins For Medical Use<br><b>Patent Status:</b><br><b>Filing Jurisdiction:</b><br><b>Licensees:</b>                | <b>Patent Number:</b> PCT/US2021/026599<br><b>Patent Holder:</b><br><b>Additional Information:</b>                                |      |  |
| <b>Patent - Escherichia Coli Compositions and Methods Thereo</b>                                                                                                                   | No                                                                                                                                | Self |  |
| <b>Description:</b> Escherichia Coli Compositions and Methods Thereof<br><b>Patent Status:</b><br><b>Filing Jurisdiction:</b><br><b>Licensees:</b>                                 | <b>Patent Number:</b> PCT/IB2021/059820<br><b>Patent Holder:</b><br><b>Additional Information:</b>                                |      |  |
| <b>Patent - Immunogenic Compositions Comprising Conjugated C ...</b>                                                                                                               | No                                                                                                                                | Self |  |
| <b>Description:</b> Immunogenic Compositions Comprising Conjugated Capsular Saccharide Antigens And Uses Thereof<br><b>Patent Holder:</b><br><b>Licensees:</b>                     | <b>Patent Number:</b> PCT/IB2022/054914<br><b>Patent Status:</b><br><b>Filing Jurisdiction:</b><br><b>Additional Information:</b> |      |  |

#### Additional Questions:

- Are there other relationships or activities that readers could perceive to have influenced, or that give the appearance of potentially influencing, what you wrote in the submitted work?  
No.
- What is the manuscript title?

Nirmatrelvir-ritonavir and viral rebound in COVID-19

3. **Are you the corresponding author?**

Yes.

a. **Please list the other authors' names here.**

James Rusnak Patrick Caubel

Certification

I certify that the information provided in this disclosure is complete and accurate.

Disclosure Purpose: 22-05944

Summary of Interests

| Company or Organization                                               |              |                                                   |
|-----------------------------------------------------------------------|--------------|---------------------------------------------------|
| Entity                                                                | Type         | Interest Held By                                  |
| Pfizer                                                                | Employment   | Self                                              |
| <i>Title:</i> senior vice president<br><i>Additional Information:</i> |              | <i>Position Description:</i> chief safety officer |
| Pfizer                                                                | Stock        | Self                                              |
| <i>Additional Information:</i>                                        |              |                                                   |
| Pfizer                                                                | Stock Option | Self                                              |
| <i>Additional Information:</i>                                        |              |                                                   |

Additional Questions:

- Are there other relationships or activities that readers could perceive to have influenced, or that give the appearance of potentially influencing, what you wrote in the submitted work?**  
No.
- What is the manuscript title?**  
Nirmatrelvir-Ritonavir and COVID-19 Viral Load Rebound
- Are you the corresponding author?**  
No.

Certification

I certify that the information provided in this disclosure is complete and accurate.

Disclosure Purpose: 22-05944

Summary of Interests

| Company or Organization                                                                                      |                  |                                |
|--------------------------------------------------------------------------------------------------------------|------------------|--------------------------------|
| Entity                                                                                                       | Type             | Interest Held By               |
| Pfizer, Inc.                                                                                                 | Employment       | Self                           |
| <i>Title:</i> SVP, Chief Development Officer, Internal Medicine & Hospital<br><i>Additional Information:</i> |                  | <i>Position Description:</i>   |
| Pfizer, Inc.                                                                                                 | Other Securities | Self                           |
| <i>Security Description:</i>                                                                                 |                  | <i>Additional Information:</i> |
| Pfizer, Inc.                                                                                                 | Stock            | Self                           |
| <i>Additional Information:</i>                                                                               |                  |                                |

Additional Questions:

- Are there other relationships or activities that readers could perceive to have influenced, or that give the appearance of potentially influencing, what you wrote in the submitted work?**  
No.
- What is the manuscript title?**  
Nirmatrelvir–Ritonavir and Viral Load Rebound in Covid-19
- Are you the corresponding author?**  
No.

Certification

I certify that the information provided in this disclosure is complete and accurate.
